# Supplementary material for: A smart adhesive Janus hydrogel for non-invasive cardiac repair and tissue adhesion prevention
Source: PubMed Central journal article supplement (PMC9744843; doi:10.1038/s41467-022-35437-5), 2022-12-12
Supplement: 41467_2022_35437_MOESM3_ESM.pdf [file 41467_2022_35437_MOESM3_ESM.pdf]

#### **Description of Additional Supplementary Files**

**Supplementary Movie 1:** The remarkable adhesive strength of CPAMC hydrogel to heart tissue was shown to endure water flow.

**Supplementary Movie 2:** Instant adhesion of the CPAMC hydrogel to PP substrate underwater and an ability of the glued substrate to lift a weight of 50 g.

**Supplementary Movie 3:** The glued substrate of CPAMC hydrogel could lift a weight of 1.5 Kg after contact for 48 h at RT.

**Supplementary Movie 4:** GSH (30 wt.%) triggered facile detachment of the CPAMC hydrogel after treatment 5min.

**Supplementary Movie 5:** Comparison in the adhesion of the CPAMC side and PCA side of the CPAMC/PCA Janus hydrogel in binding the pig skin tissue.

**Supplementary Movie 6:** The calcium transient of CMs on different hydrogels at day 7 of culture.

**Supplementary Movie 7:** The spontaneous contraction activity of CMs seeded on CPAMC hydrogel culture different times.
